# Supplementary material for: Biomimetic open porous structured core-shell microtissue with enhanced mechanical properties for bottom-up bone tissue engineering
Source: PubMed Central journal article supplement (PMC6643438; doi:10.7150/thno.34464), 2019-07-09
Supplement: thnov09p4663s1.pdf [file thnov09p4663s1.pdf]

## Supplementary data

### **Biomimetic open porous structured core-shell microtissue with superior mechanical properties for bottom-up bone tissue engineering**

Chao Luo<sup>a,#</sup>, Huimin Fang<sup>a,#</sup>, Muran Zhou<sup>a</sup>, Jialun Li<sup>a</sup>, Xinyue Zhang<sup>a</sup>,  
Shaokai Liu<sup>a</sup>, Chuchao Zhou<sup>a</sup>, Jinfei Hou<sup>a</sup>, Huan He<sup>a</sup>, Jiaming Sun<sup>a,\*</sup>,  
Zhenxing Wang<sup>a,\*</sup>

<sup>a</sup> Department of Plastic Surgery, Union Hospital, Tongji Medical College, Huazhong University of Science and Technology, Wuhan 430022, China.

# These authors contributed equally to this work.

\* Corresponding authors

Corresponding authors' e-mail addresses:

\*Zhenxing Wang: wangzhenxing@hust.edu.cn

\*Jiaming Sun: sunjiaming@hust.edu.cn

**Table S1.** Explanation of samples tested in the experiment.

| Sample                    | Explanation                                                           |
|---------------------------|-----------------------------------------------------------------------|
| Core-shell micro-scaffold | Microgel fabricated by DBM-gelatin mixture                            |
| Core-shell microtissue    | Cell-material composite of seeded BMSCs and core-shell micro-scaffold |
| Gelatin micro-scaffold    | Microgel fabricated by simple gelatin solution                        |
| Gelatin microtissue       | Cell-material composite of seeded BMSCs and gelatin micro-scaffold    |

**Table S2.** Primers sequences used in qRT-PCR.

| Gene               | Primer sequence                 |
|--------------------|---------------------------------|
| R- $\beta$ actin-F | 5'- TGCTATGTTGCCCTAGACTTCG-3'   |
| R- $\beta$ actin-R | 3'- GTTGGCATAGAGGTCTTTACGG-5'   |
| R-OCN-F            | 5'- CATCTATGGCACCACCGTTTA-3'    |
| F-OCN-R            | 3'- CATCTATGGCACCACCGTTTA-5'    |
| R-Runx2-F          | 5'- CAGTATGAGAGTAGGTGTCCCGC-3'  |
| F-Runx2-R          | 3'- AAGAGGGGTAAGACTGGTCATAGG-5' |
| R-BMP-2-F          | 5'- AACACCGTGCTCAGCTTCCAT-3'    |
| F-BMP-2-R          | 3'- GAAGAAGAAGCGTCGGGAAGT-5'    |
| R-Smad1-F          | 5'- GACTGCCTCATGTCATTTATTGC-3'  |
| F-Smad1-R          | 3'- CGCTTATAGTGGTAGGGATTGATG-5' |

**F: Forward; R: Reverse.**

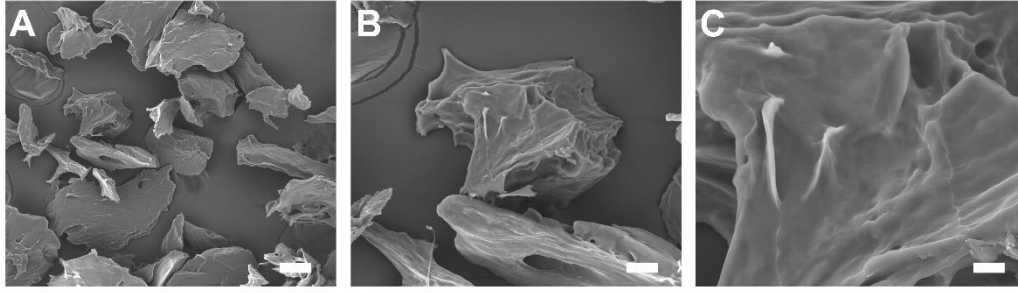

**Figure S1** SEM images of DBM particles. (Scale bars in A: 125  $\mu\text{m}$ , scale bars in B: 50  $\mu\text{m}$ , scale bars in C: 12.5  $\mu\text{m}$ )

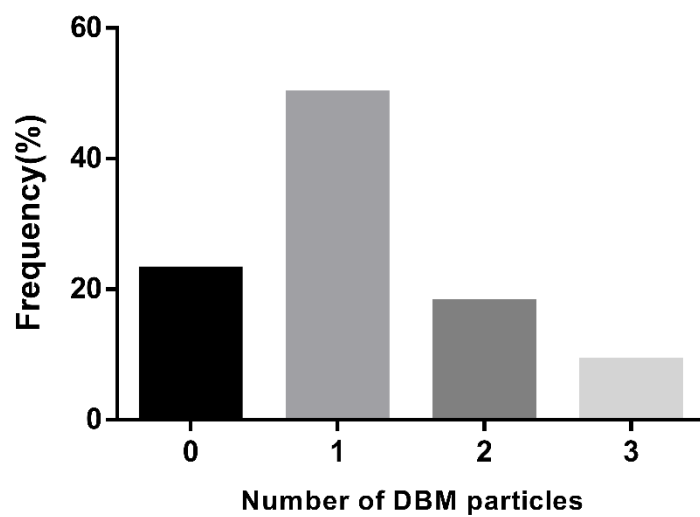

**Figure S2** Number of DBM particles in each core-shell micro-scaffolds was counted. Approximately 50% core-shell micro-scaffolds have only one DBM particle as the core.

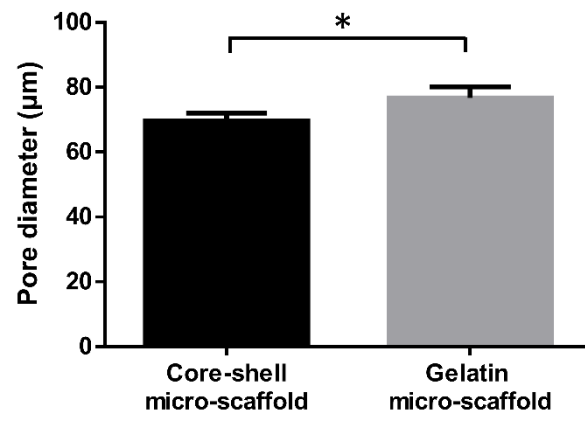

**Figure S3** Pore diameter of core-shell micro-scaffold and gelatin micro-scaffold. (\*: p<0.05)

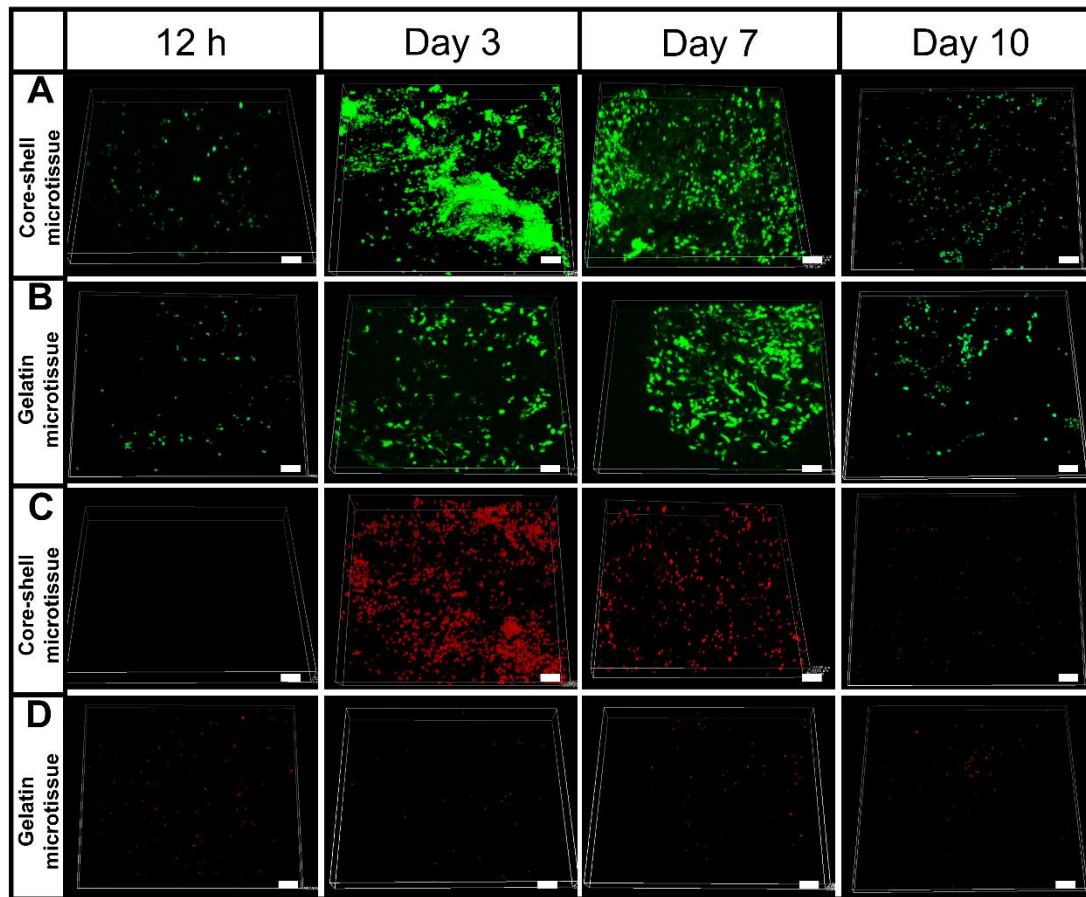

**Figure S4** Confocal images of FDA staining and PI staining. (A, B) Confocal images of FDA staining of core-shell microtissue and gelatin microtissue, wherein green fluorescence indicated cytoplasm of live cells. (C, D) Confocal images of PI staining of core-shell microtissue and gelatin microtissue, wherein red fluorescence indicated nucleus of dead cells. (Scale bars: 150  $\mu\text{m}$ )
